# Supplementary material
Source: PubMed Central journal article supplement (PMC3927550)
Supplement: jn.113.176693_nutrition176693SupplementaryData1.pdf [file jn.113.176693_nutrition176693SupplementaryData1.pdf]

# Online Supporting Material

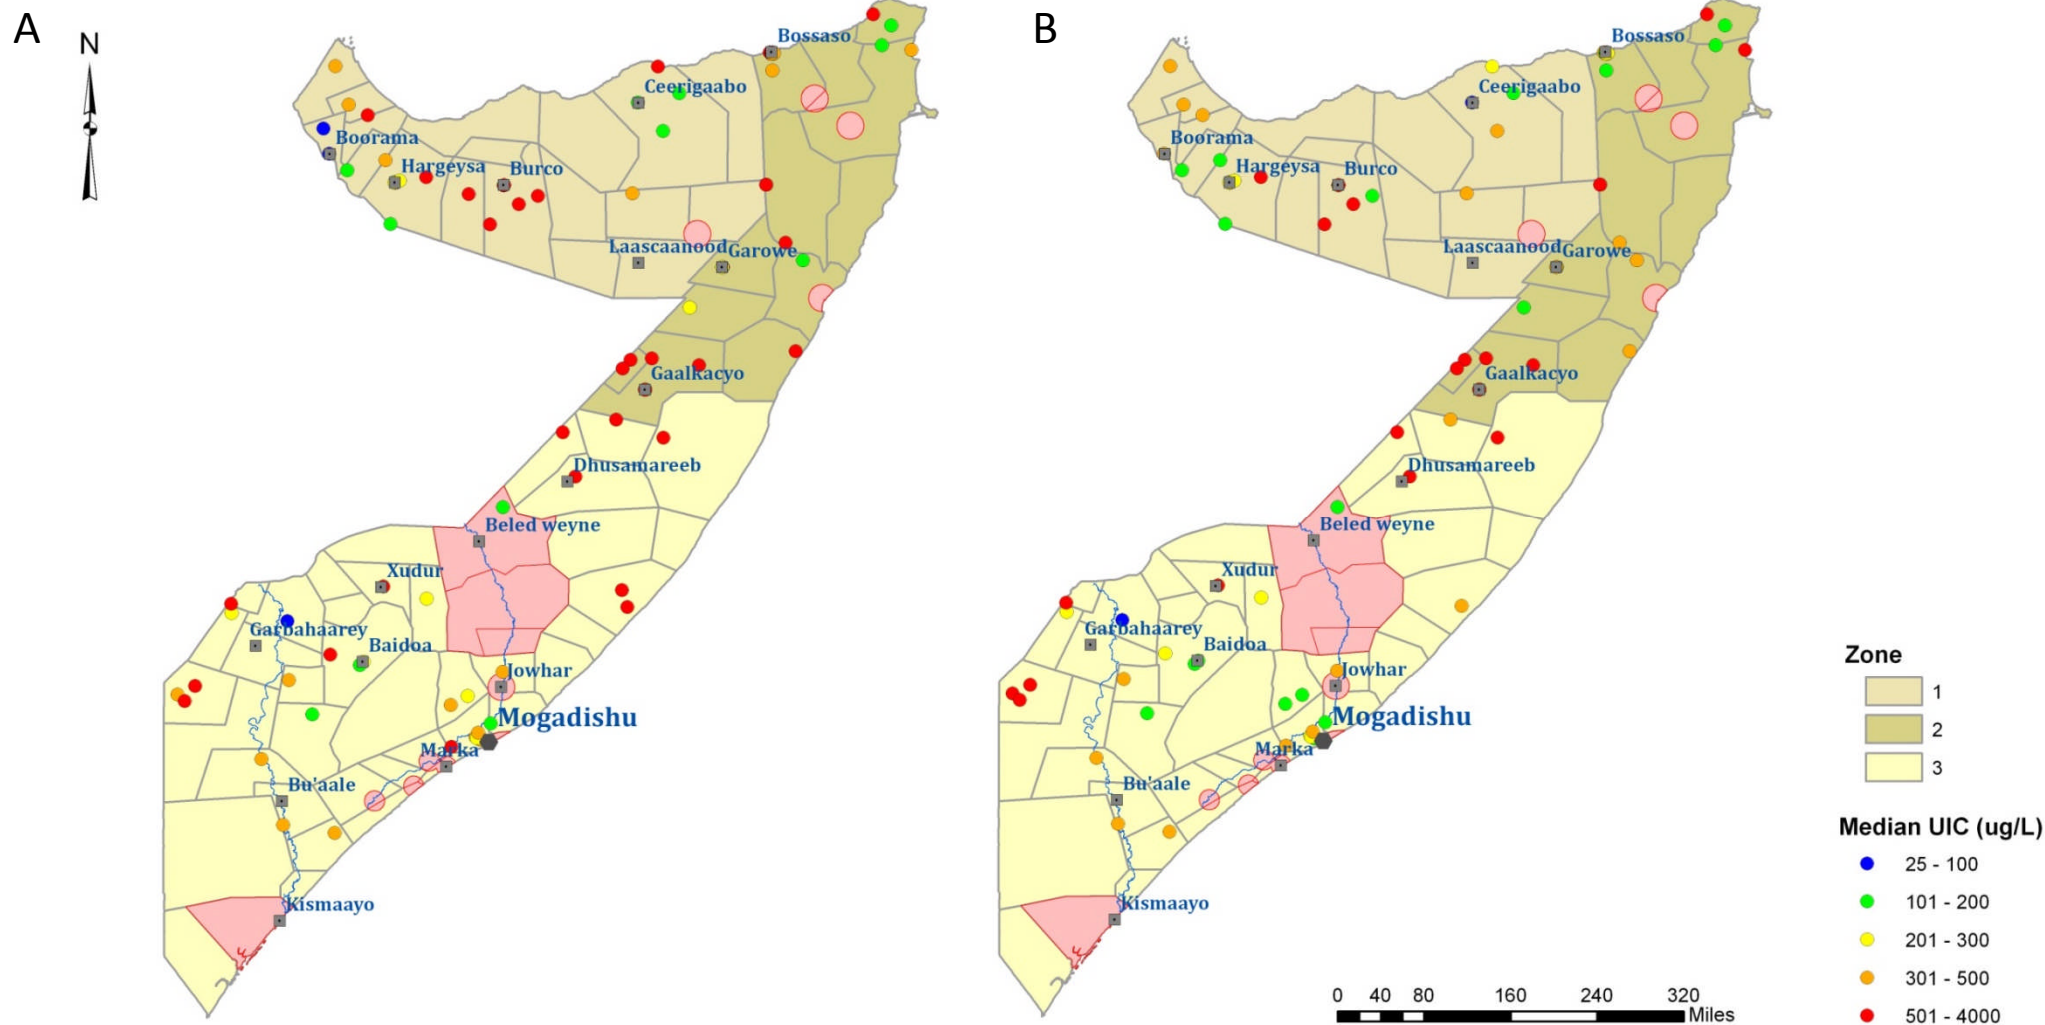

## Supplemental FIGURE 1

Spatial distribution of median urinary iodine concentration ( $\mu\text{g/L}$ ) in (A) school aged children (aged 6 - 11 years) and (B) women (aged 15 - 49 years). Coloured dots represent the location of survey clusters. Areas and locations that were excluded from the sampling frame due to insecurity are indicated in pink

## Online Supporting Material

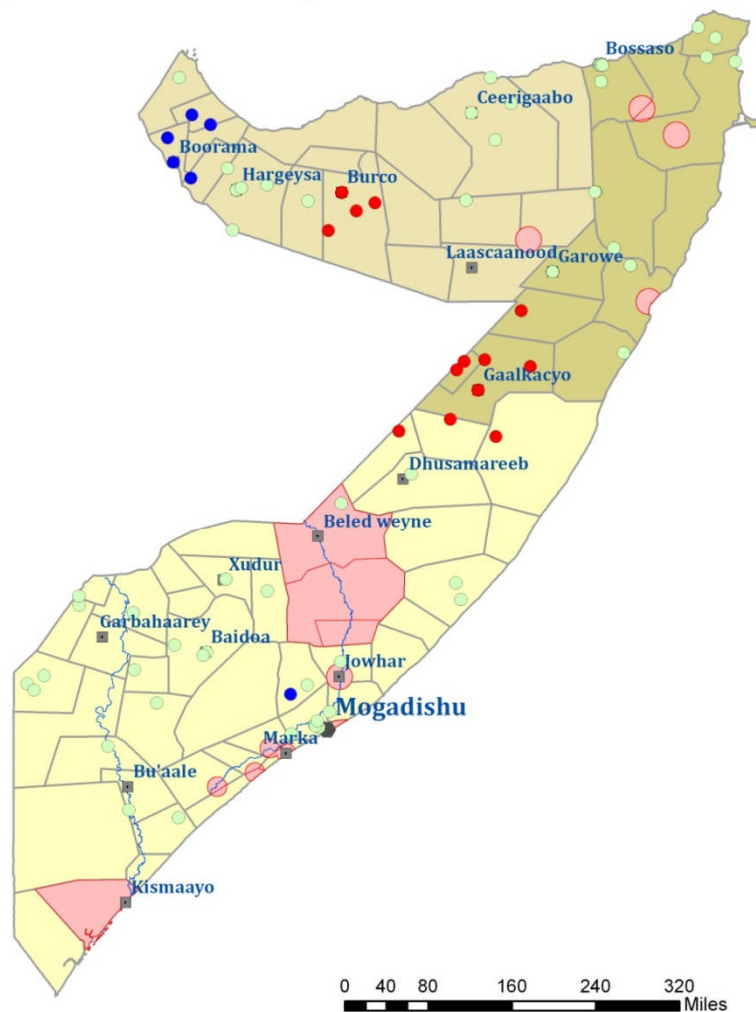

### Supplemental FIGURE 2

Analysis of the spatial clustering of median urinary iodine concentration of children (aged 6-11 years) in survey clusters. Areas of relatively high and low UIC concentration are identified by the GiZ scores calculated using the ArcGIS Hot spot tool.

#### GiZ Score

- < -2.58 Std. Dev.
- -2.58 - -1.96 Std. Dev.
- -1.96 - -1.65 Std. Dev.
- -1.65 - 1.65 Std. Dev.
- 1.65 - 1.96 Std. Dev.
- 1.96 - 2.58 Std. Dev.
- > 2.58 Std. Dev.

#### Zone

- 1
- 2
- 3
